# Supplementary material
Source: publisher figshare collection journal article supplement (https://gsajournals.figshare.com/ndownloader/files/13507277)
Supplement: Supplementary file 1 [file 13507277]

**Table S2. Genbank accession numbers and evidence for ZP proteins.**

| **GenBank Accession Number** | **Uniprot Entry** | **Protein names** | **ZP domain evidence** | | | |
| --- | --- | --- | --- | --- | --- | --- |
| **PROSITE** | **SMART** | **Pfam** | **InterPro** |
| CAA88934.1 | Q03755 | CUT-1 | Y | Y | Y | Y |
| CAA90355.1 | Q19707 | CUT-3 | Y | Y | Y | Y |
| CAA91280.2 | Q19053 | CUT-4 | Y | Y |  | Y |
| CAA89068.3 | Q21808 | CUT-5a | Y | Y |  | Y |
| CBH29667.1 | D0VWM7 | CUT-5b | Y | Y |  | Y |
| CAA97806.2 | Q21540 | CUT-6 | Y | Y |  | Y |
| CAB03124.3 | Q9XVM7 | CUTL-1 | Y | Y | Y | Y |
| CAB16488.1 | O18213 | CUTL-2 | Y | Y | Y | Y |
| CAB01742.2 | Q93532 | CUTL-3 | Y | Y |  | Y |
| CAB04922.3 | G5EFQ3 | CUTL-4 | Y | Y |  | Y |
| CCD69170.1 | Q19304 | CUTL-5 | Y | Y |  | Y |
| CAA95850.3 | Q23097 | CUTL-6 | Y | Y | Y | Y |
| CAB03116.2 | Q9XVN2 | CUTL-7 | Y | Y | Y | Y |
| CBZ01806.1 | G5EDD6 | CUTL-8a | Y | Y |  | Y |
| CAA90131.3 | Q21573 | CUTL-9 | Y | Y | Y | Y |
| CAB60411.1 | Q9U250 | CUTL-10 | Y | Y | Y | Y |
| CAA91480.1 | Q22164 | CUTL-11 | Y | Y | Y | Y |
| CZR14494.1 | A0A131MBI8 | CUTL-12a | Y | Y |  | Y |
| CZR14495.1 | A0A131MB05 | CUTL-12b | Y | Y |  | Y |
| CCD73389.1 | Q9TZE2 | CUTL-13 | Y | Y | Y | Y |
| CCD62106.1 | O61816 | CUTL-14 | Y | Y | Y | Y |
| CAA92696.2 | Q22627 | CUTL-15 | Y | Y | Y | Y |
| CCD72611.1 | Q09586 | CUTL-16 | Y | Y |  | Y |
| CAA92773.3 | Q20167 | CUTL-17 | Y | Y |  | Y |
| CAA98485.2 | G5EBR9 | CUTL-18 | Y | Y |  | Y |
| CCD68060.1 | Q9TYT4 | CUTL-20a | Y |  |  | Y |
| CDK13580.1 | V6CJG5 | CUTL-20b | Y |  |  | Y |
| CCD69971.1 | O16304 | CUTL-22 | Y | Y | Y | Y |
| SAP35541.1 | A0A164D3B2 | CUTL-23a | Y | Y | Y | Y |
| SAP35542.1 | A0A168H2V5 | CUTL-23b | Y | Y | Y | Y |
| CCD70249.1 | H2KZW9 | CUTL-24a | Y | Y | Y | Y |
| CCD70250.1 | Q688Z8 | CUTL-24b | Y | Y | Y | Y |
| CCD72202.2 | Q7KWZ4 | CUTL-25 | Y | Y | Y | Y |
| CCD70963.1 | Q95XW3 | CUTL-26a | Y | Y |  | Y |
| CCD70964.1 | H2L015 | CUTL-26b | Y | Y |  | Y |
| CAA96604.4 | Q18298 | CUTL-27 | Y | Y |  | Y |
| CCD70958.1 | O61834 | CUTL-28 | Y | Y |  | Y |
| CCD69411.1 | Q19379 | CUTL-29 | Y | Y | Y | Y |
| CAA87330.2 | Q09276 | DYF-7 | Y | Y | Y | Y |
| CCD68075.1 | A3FPI7 | F46G11.6 | Y |  |  | Y |
| CCJ09401.1 | I7J4C8 | FBN-1a | Y | Y |  | Y |
| CCJ09402.1 | I7LHV8 | FBN-1b | Y | Y |  | Y |
| CCJ09404.1 | I7K4J2 | FBN-1d | Y | Y |  | Y |
| CCD65255.1 | Q23587 | FBN-1e | Y | Y |  | Y |
| CCJ09405.1 | I7LFE6 | FBN-1f | Y | Y |  | Y |
| CCJ09406.1 | I7J4C9 | FBN-1g | Y | Y |  | Y |
| CCJ09407.1 | I7LHV9 | FBN-1h | Y | Y |  | Y |
| CCJ09408.1 | I7KSC8 | FBN-1i | Y | Y |  | Y |
| CCJ09410.1 | I6ZKX2 | FBN-1k | Y | Y |  | Y |
| CAA96602.2 | Q27394 | LET-653a | Y | Y | Y | Y |
| CAH60755.1 | N. D. | LET-653b | Y | Y | Y | Y |
| CAA62505.1 | N. D. | LET-653c | Y | Y | Y | Y |
| CCD73001.1 | G4SNP7 | M01E10.2a | Y | Y |  | Y |
| CCD73002.1 | Q9TXR6 | M01E10.2b | Y | Y |  | Y |
| CCD66690.2 | H8W3Y1 | NOAH-1c | Y | Y |  | Y |
| CCG28186.1 | Q8T3B7 | NOAH-1b | Y | Y |  | Y |
| CCD66686.2 | H2KZ73 | NOAH-1a | Y | Y |  | Y |
| CAB05199.1 | Q9XUE5 | NOAH-2 | Y | Y |  | Y |
| CCD67116.1 | O17291 | R52.6 | Y |  |  | Y |
| CAA92199.3 | G5EC82 | RAM-5 | Y | Y |  | Y |
| CCD71498.1 | Q3HKB6 | T01D1.8a | Y |  |  | Y |
| CTQ86530.1 | A0A0K3AUQ6 | T01D1.8b | Y |  |  | Y |
| CAB03404.1 | O18117 | T23F1.5 | Y | Y |  | Y |

N. D. = No number assigned.

Y = Called as a ZP domain by program.
